# Supplementary material
Source: Springer Nature journal article supplement (https://www.springermedizin.de/resource/supplementary/12889_2011_3917_MOESM1_ESM.pdf/9491040)

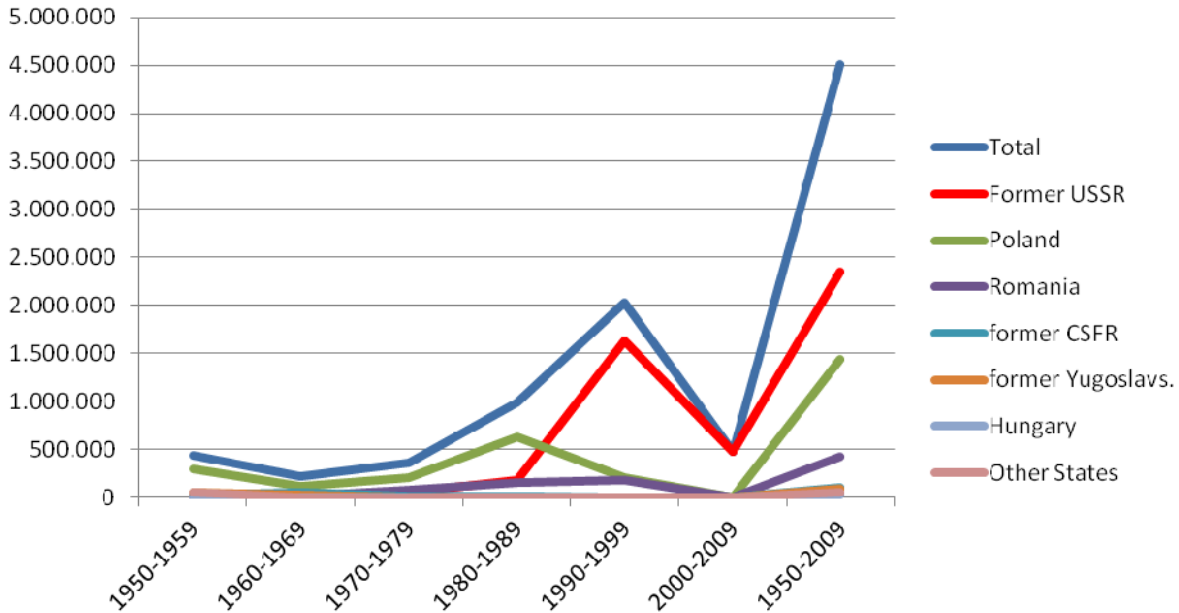

Supplement: MOESM1 [file 9491040]
